# Supplementary material
Source: publisher figshare collection journal article supplement (https://future-science-group.figshare.com/ndownloader/files/31491593)
Supplement: Supplementary file 1 [file 31491593]

| Table S1: Quality assessment of eligible studies using the Newcastle Ottawa quality assessment scale | | | | | | | | | | |
| --- | --- | --- | --- | --- | --- | --- | --- | --- | --- | --- |
| **Authors (y)** | **Selection** | | | | **Comparability** | | **Outcome** | | | **Total**  **Score** |
| **Representativeness of the exposed cohort** | **Selection**  **of the**  **Nonexposed**  **Cohort** | **Ascertainment**  **of Exposure** | **Demonstration**  **that Outcome**  **of Interest Was**  **Not Present at**  **Start of Study** | **Comparability of Cohorts on the**  **Basis of the Design or Analysis** | | **Assessment**  **of Outcome** | **Was**  **Follow-Up**  **Long Enough**  **for Outcomes**  **to Occur** | **Adequacy of**  **Follow-Up of Cohorts** |
| **Age** | **Any Other**  **Additional**  **Factor** |
| Lei(2015) | 1 | 1 | 1 | 0 | 1 | 1 | 1 | 1 | 1 | 8 |
| Zheng(2015) | 1 | 1 | 1 | 0 | 0 | 0 | 1 | 1 | 1 | 6 |
| Cha(2016) | 1 | 1 | 1 | 0 | 1 | 1 | 1 | 1 | 1 | 8 |
| Yoshida(2016) | 1 | 1 | 1 | 0 | 1 | 1 | 1 | 1 | 1 | 8 |
| Noh(2017) | 1 | 1 | 1 | 0 | 1 | 0 | 1 | 1 | 1 | 7 |
| Woo(2017) | 1 | 1 | 1 | 0 | 1 | 1 | 1 | 1 | 1 | 8 |
| Li(2018) | 1 | 1 | 1 | 0 | 1 | 1 | 1 | 1 | 1 | 8 |
| Lin(2018) | 1 | 1 | 1 | 0 | 1 | 1 | 1 | 1 | 1 | 8 |
| Lv(2018) | 1 | 1 | 1 | 0 | 1 | 1 | 1 | 1 | 1 | 8 |
| Meleer-florin(2018) | 1 | 1 | 1 | 0 | 1 | 0 | 1 | 1 | 1 | 7 |
| Mitiushkina(2018) | 1 | 1 | 1 | 0 | 1 | 1 | 1 | 1 | 1 | 8 |
| Camidge(2019) | 1 | 1 | 1 | 1 | 0 | 0 | 1 | 1 | 1 | 7 |
| Christopoulos(2019) | 1 | 1 | 1 | 0 | 1 | 1 | 1 | 1 | 1 | 8 |
| Horn(2019) | 1 | 1 | 1 | 1 | 0 | 0 | 1 | 1 | 1 | 7 |
| Lin(2019) | 1 | 1 | 1 | 0 | 1 | 1 | 1 | 1 | 1 | 8 |
| Su(2019) | 1 | 1 | 1 | 0 | 1 | 1 | 1 | 1 | 1 | 8 |
| Yu(2019) | 1 | 1 | 1 | 0 | 0 | 0 | 1 | 1 | 1 | 6 |
| Li(2020) | 1 | 1 | 1 | 0 | 1 | 1 | 1 | 1 | 1 | 8 |
| Qiao(2020) | 1 | 1 | 1 | 0 | 1 | 1 | 1 | 1 | 1 | 8 |
| Tao(2020) | 1 | 1 | 1 | 0 | 0 | 1 | 1 | 1 | 1 | 7 |
| Zheng(2020) | 1 | 1 | 1 | 0 | 0 | 0 | 1 | 1 | 1 | 6 |
| Batra(2021) | 1 | 1 | 1 | 0 | 1 | 1 | 1 | 1 | 1 | 8 |
| Chang(2021) | 1 | 1 | 1 | 0 | 1 | 1 | 1 | 1 | 1 | 8 |
| Christopoulos(2021) | 1 | 1 | 1 | 0 | 1 | 1 | 1 | 1 | 1 | 8 |
| Hou(2021) | 1 | 1 | 1 | 0 | 1 | 1 | 1 | 1 | 1 | 8 |
| Lee(2021) | 1 | 1 | 1 | 0 | 0 | 0 | 1 | 1 | 1 | 6 |
| Li(2021) | 1 | 1 | 1 | 0 | 0 | 0 | 1 | 1 | 1 | 6 |
| Shafie(2021) | 1 | 1 | 1 | 0 | 1 | 1 | 1 | 1 | 1 | 8 |
